# Supplementary material for: Brain microRNAs associated with late-life depressive symptoms are also associated with cognitive trajectory and dementia
Source: PubMed Central journal article supplement (PMC7004995; doi:10.1038/s41525-019-0113-8), 2020-02-06
Supplement: 41525_2019_113_MOESM1_ESM.pdf [file 41525_2019_113_MOESM1_ESM.pdf]

**Supplementary Figure 1:** All four depression-associated miRNAs showed lower abundance in participants with greater depressive symptoms. The blue line represents the best fit regression line and the shaded grey area represents the 95% confidence interval for the regression.

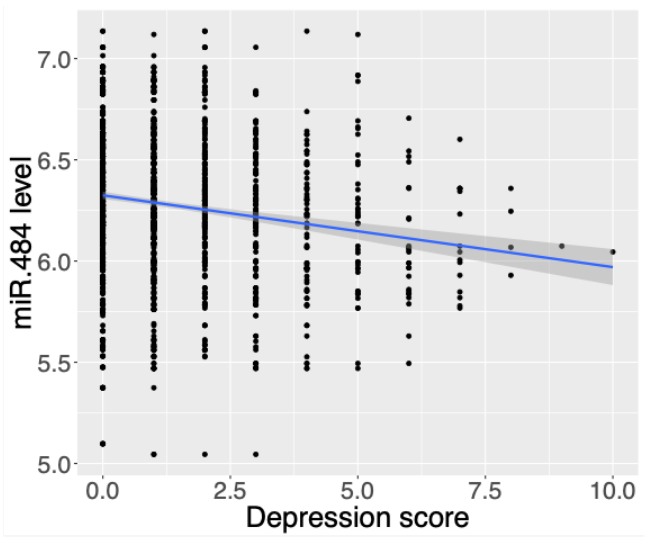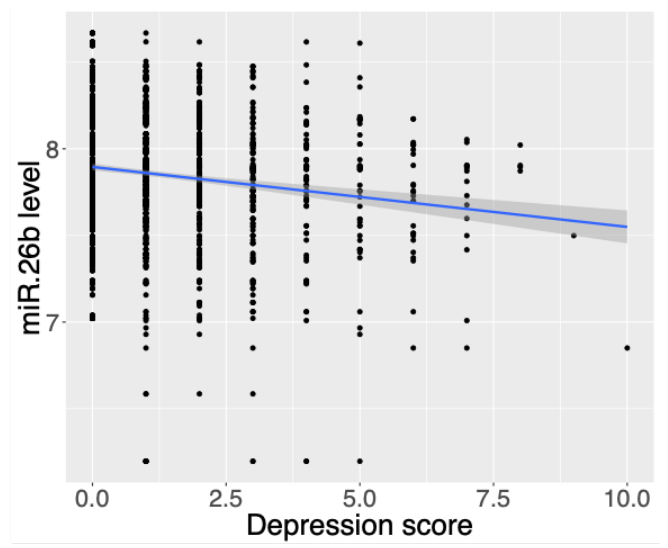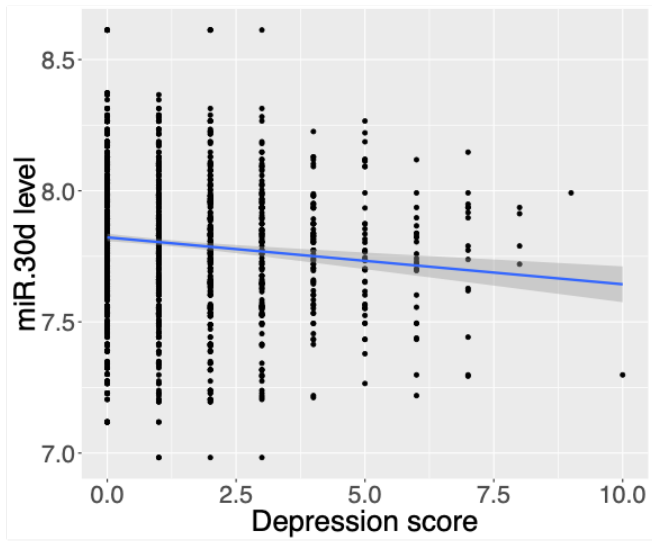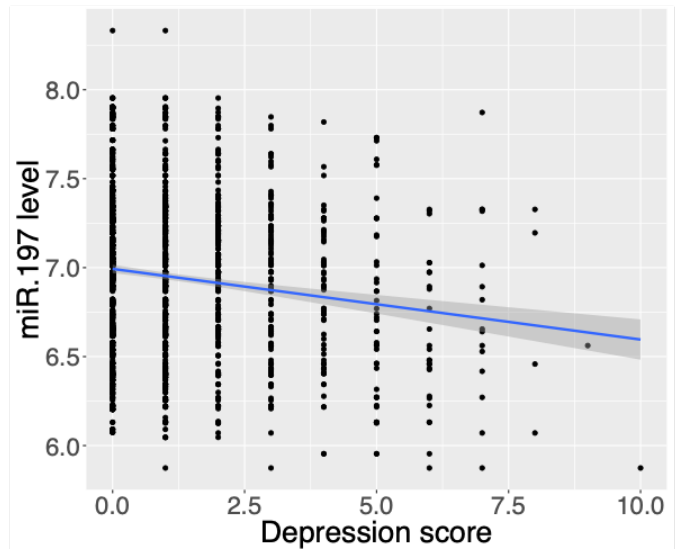

**Supplementary Figure 2:** Depression-associated miRNAs were associated with dementia features. **A)** miR-484 was significantly down-regulated in faster cognitive decline ( $p=0.012$ ;  $N=482$ ). **B)** miR-197 was significantly down-regulated in faster cognitive decline ( $p=0.020$ ;  $N=482$ ). **C)** down-regulation of miR-484 was associated with higher probability for a diagnosis of MCI or AD ( $p=0.009$ ,  $N=505$ ).

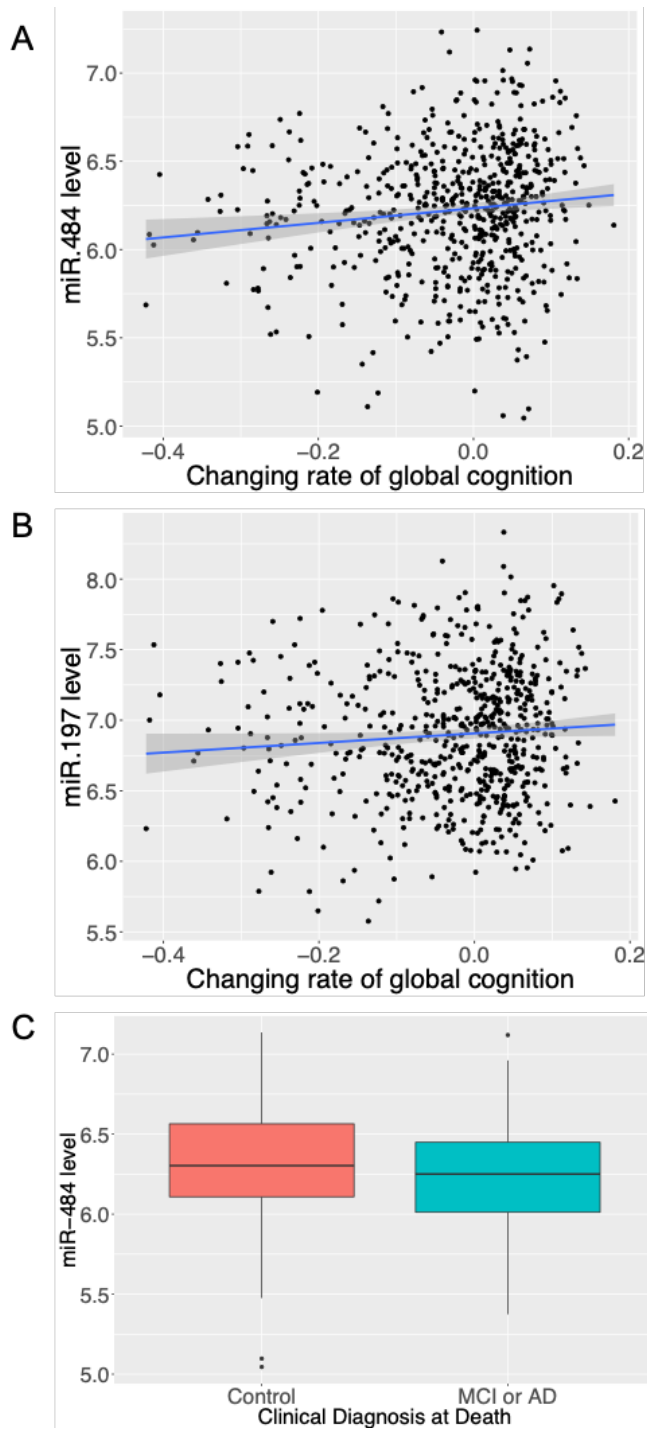

**Supplementary Figure 3:** Enrichment of the predicted targets of miR-484 in BLSA protein co-expression modules. The potential targets of miR-484 were those with cumulative weighted context score < -0.1. The y-axis lists the 16 brain protein co-expression modules and their enriched biological activities from Seyfrieds et al 2017. The blue line perpendicular to the x-axis represents Benjamini-Hochberg adjusted  $p < 0.05$ .

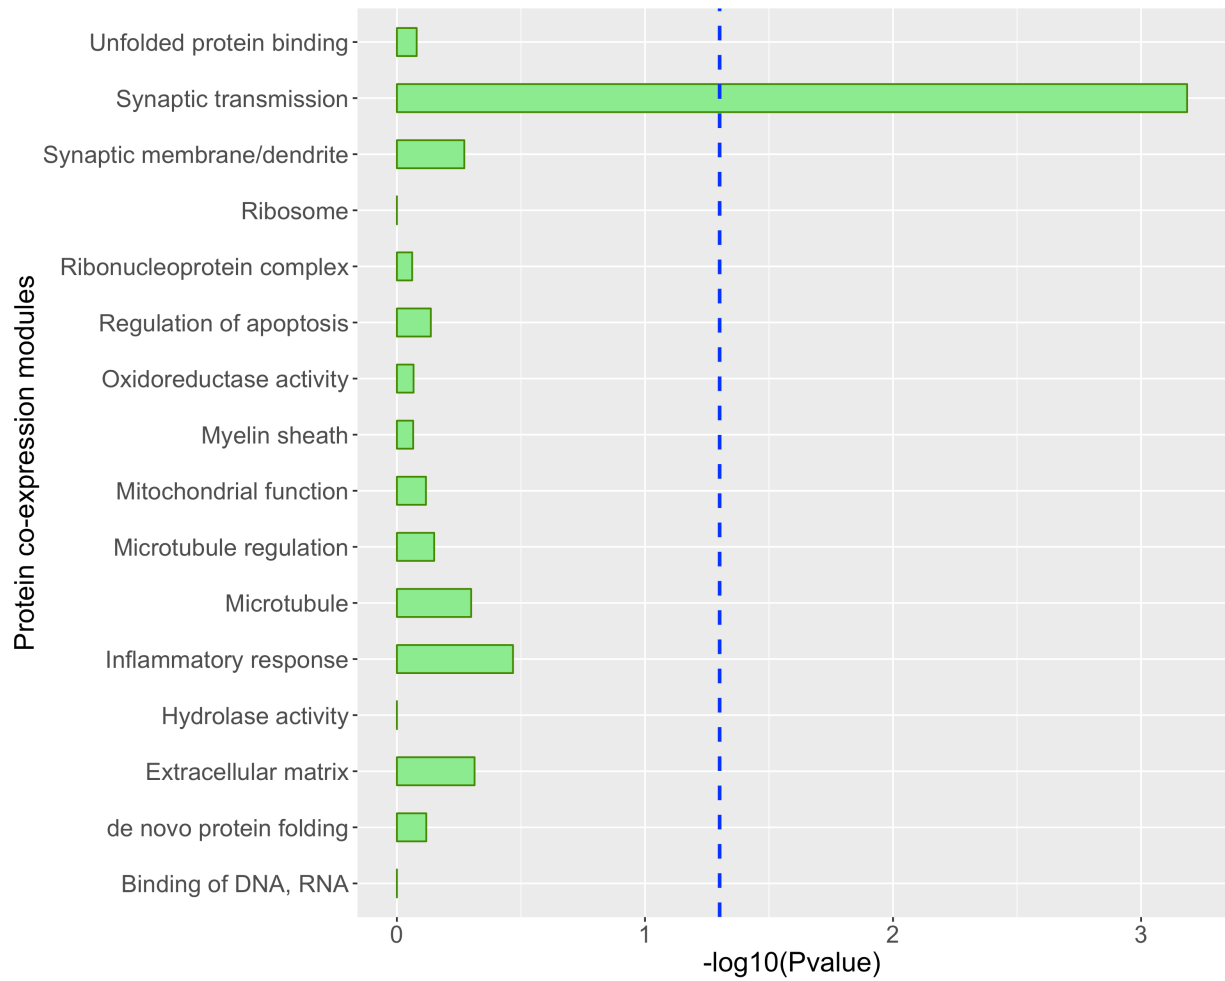

**Supplementary Figure 4:** In our biological replication cohort, miR-484 was inversely associated with the level of depressive symptom severity after adjusting for sex, age at visit, RIN, PMI, global AD pathology burden, study, and sequencing batch (N=160).

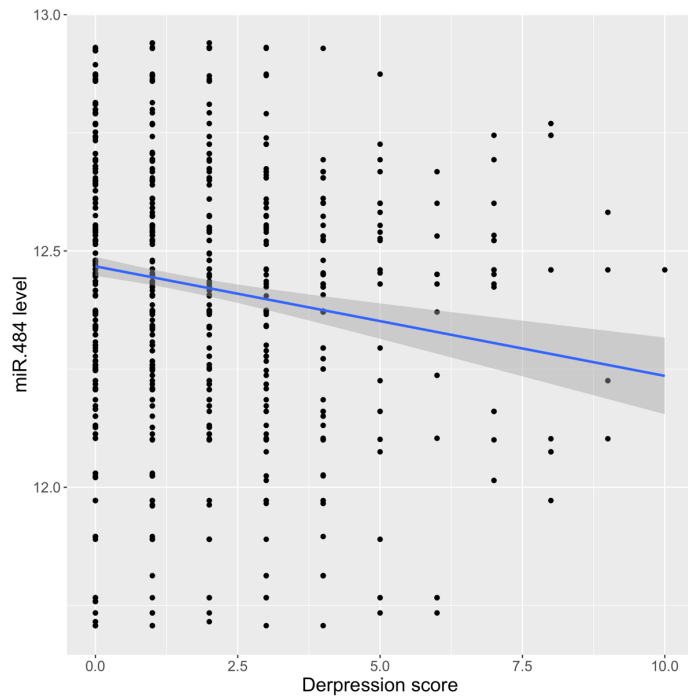

**Supplementary Table 1:** Global miRNA association study of late-life depressive symptoms adjusting for sex, age, global AD pathologies, PMI, RIN, proportions of neurons, astrocytes, oligodendrocytes, and microglia, and study

| <b>miRNA</b>            | <b>beta</b> | <b>SE_beta</b> | <b>p</b>    | <b>Adjusted p</b> |
|-------------------------|-------------|----------------|-------------|-------------------|
| hsa.miR.484             | -0.7125696  | 0.19969296     | 0.000359269 | 0.04640937        |
| hsa.miR.26b             | -0.6696429  | 0.18891811     | 0.00039318  | 0.04640937        |
| hsa.miR.197             | -0.5393892  | 0.15439982     | 0.000476809 | 0.04640937        |
| hsa.miR.30d             | -0.9209513  | 0.26975993     | 0.000640245 | 0.0467379         |
| hsa.miR.125b            | 0.51258953  | 0.16024153     | 0.001379742 | 0.08057693        |
| hsa.miR.124             | -0.555506   | 0.17668994     | 0.001666784 | 0.08111683        |
| hsa.miR.300             | 0.51157984  | 0.17502453     | 0.003467838 | 0.13621322        |
| hsa.miR.142.3p          | 0.53742911  | 0.18644256     | 0.003944764 | 0.13621322        |
| hsa.miR.29b             | -0.5834141  | 0.20378712     | 0.004198353 | 0.13621322        |
| hsa.miR.1206            | 0.50625508  | 0.17951631     | 0.004800774 | 0.14018261        |
| hsa.miR.142.5p          | 0.8033347   | 0.28852543     | 0.005364722 | 0.14240897        |
| hsa.miR.23b             | -0.7632721  | 0.28414697     | 0.007227247 | 0.16261557        |
| hsa.miR.155             | -0.6310626  | 0.23497915     | 0.007239734 | 0.16261557        |
| hsa.miR.362.5p          | -0.5822941  | 0.2246541      | 0.009543124 | 0.19904229        |
| hsa.miR.770.5p          | 0.51465131  | 0.20573109     | 0.012364299 | 0.22141786        |
| hsa.miR.487b            | -0.5202978  | 0.21049405     | 0.013443729 | 0.22141786        |
| hsa.miR.20a_hsa.miR.20b | -0.671497   | 0.27323373     | 0.013987209 | 0.22141786        |
| hsa.miR.196a            | -0.3959787  | 0.16173325     | 0.014351427 | 0.22141786        |
| hsa.miR.222             | -0.5412123  | 0.22198275     | 0.01476539  | 0.22141786        |
| hsa.miR.548b.3p         | 0.42173925  | 0.17466507     | 0.015754241 | 0.22141786        |
| hsa.miR.220a            | 0.48323311  | 0.20128243     | 0.016360551 | 0.22141786        |
| hsa.miR.128             | -0.4196713  | 0.17723385     | 0.017889579 | 0.22141786        |
| hsa.miR.410             | -0.3810636  | 0.16178649     | 0.018505336 | 0.22141786        |
| hsa.miR.491.3p          | -0.4609165  | 0.19650252     | 0.018996426 | 0.22141786        |
| hsa.miR.150             | -0.5596451  | 0.24035156     | 0.019888543 | 0.22141786        |
| hsa.miR.335             | 0.52482858  | 0.22638622     | 0.020433642 | 0.22141786        |
| hsa.miR.885.5p          | -0.4660793  | 0.2019971      | 0.021034964 | 0.22141786        |
| hsa.miR.30b             | -0.6037881  | 0.26360251     | 0.021990917 | 0.22141786        |
| hsa.miR.1248            | 0.4523776   | 0.19847915     | 0.022654005 | 0.22141786        |
| hsa.miR.129.5p          | -0.6553795  | 0.28927213     | 0.023474915 | 0.22141786        |
| hsa.miR.133a            | -0.5312906  | 0.23455526     | 0.023506691 | 0.22141786        |
| hsa.miR.30c             | -0.4442528  | 0.19908246     | 0.025647934 | 0.2340374         |
| hsa.miR.543             | -0.4924607  | 0.22373699     | 0.027731084 | 0.24078317        |
| hsa.let.7b              | -0.5935636  | 0.27115063     | 0.028592843 | 0.24078317        |
| hsa.miR.891b            | 0.3662935   | 0.16858476     | 0.029798708 | 0.24078317        |
| hsa.miR.633             | -0.2146288  | 0.0991628      | 0.030433033 | 0.24078317        |
| hsa.miR.26a             | -0.4905832  | 0.22676457     | 0.030510196 | 0.24078317        |
| hsa.miR.7               | 0.25938475  | 0.12150355     | 0.032778044 | 0.25187339        |
| hsa.miR.1246            | -0.2348418  | 0.11132404     | 0.034898569 | 0.25807506        |
| hsa.miR.138             | -0.465706   | 0.22144736     | 0.0354649   | 0.25807506        |
| hsa.miR.758             | 0.3910081   | 0.1867044      | 0.036236567 | 0.25807506        |
| hsa.miR.203             | -0.4219578  | 0.20334907     | 0.037982662 | 0.25855165        |
| hsa.let.7g              | 0.53147162  | 0.25624785     | 0.038074387 | 0.25855165        |

|                               |            |            |             |            |
|-------------------------------|------------|------------|-------------|------------|
| hsa.miR.769.3p                | -0.4028525 | 0.19643354 | 0.040283176 | 0.2673338  |
| hsa.miR.324.3p                | 0.61016936 | 0.30179511 | 0.043197011 | 0.27294504 |
| hsa.miR.218                   | 0.37247234 | 0.18546144 | 0.044605625 | 0.27294504 |
| hsa.miR.19b                   | 0.46024967 | 0.23012655 | 0.045501869 | 0.27294504 |
| hsa.miR.216a                  | -0.2983661 | 0.14970031 | 0.046251655 | 0.27294504 |
| hsa.miR.639                   | 0.36139202 | 0.18194468 | 0.04700289  | 0.27294504 |
| hsa.miR.15b                   | 0.45823108 | 0.23304761 | 0.049269139 | 0.27294504 |
| hsa.miR.369.3p                | -0.4300076 | 0.22103348 | 0.051721935 | 0.27294504 |
| hsa.miR.518e                  | 0.3292501  | 0.16959392 | 0.05220944  | 0.27294504 |
| hsa.miR.640                   | 0.38972595 | 0.20109091 | 0.052616081 | 0.27294504 |
| hsa.miR.769.5p                | -0.398012  | 0.205947   | 0.053286189 | 0.27294504 |
| hsa.miR.566                   | 0.3369957  | 0.17519888 | 0.054416809 | 0.27294504 |
| hsa.miR.148b                  | 0.59351438 | 0.3087599  | 0.054574042 | 0.27294504 |
| hsa.miR.383                   | -0.6093182 | 0.31726834 | 0.054793055 | 0.27294504 |
| hsa.miR.183                   | 0.37475065 | 0.19545727 | 0.055199552 | 0.27294504 |
| hsa.miR.485.5p                | 0.44528445 | 0.23390607 | 0.05695068  | 0.27294504 |
| hsa.miR.299.5p                | 0.3664073  | 0.19352697 | 0.058316134 | 0.27294504 |
| hsa.miR.433                   | -0.4121804 | 0.21793902 | 0.058588974 | 0.27294504 |
| hsa.miR.361.5p                | -0.4447994 | 0.23552214 | 0.05894986  | 0.27294504 |
| hsa.let.7f                    | -0.434877  | 0.23294109 | 0.061916005 | 0.27294504 |
| hsa.miR.548d.5p               | 0.3395683  | 0.18258769 | 0.062920256 | 0.27294504 |
| hsa.miR.1308                  | -0.3026138 | 0.16296884 | 0.063328064 | 0.27294504 |
| hsa.miR.191                   | 0.37509007 | 0.20312884 | 0.064810591 | 0.27294504 |
| hsa.miR.135b                  | 0.36689963 | 0.19879139 | 0.064942824 | 0.27294504 |
| hsa.miR.374a                  | -0.3032139 | 0.1653721  | 0.066724555 | 0.27294504 |
| hsa.miR.1283                  | -0.468501  | 0.2560101  | 0.067248463 | 0.27294504 |
| hsa.miR.15a                   | 0.51942954 | 0.28384115 | 0.067249816 | 0.27294504 |
| hsa.miR.376c                  | -0.4125938 | 0.22550243 | 0.067300088 | 0.27294504 |
| hsa.miR.125a.3p               | -0.3702436 | 0.20235703 | 0.067301516 | 0.27294504 |
| hsa.miR.574.3p                | -0.3676832 | 0.20164673 | 0.068242384 | 0.27296954 |
| hsa.miR.92b                   | -0.3820533 | 0.212098   | 0.071654709 | 0.27816775 |
| hsa.miR.30e                   | -0.455355  | 0.25345629 | 0.072402003 | 0.27816775 |
| hsa.miR.154                   | 0.45354614 | 0.2531226  | 0.073164331 | 0.27816775 |
| hsa.miR.200b                  | 0.39488994 | 0.22053111 | 0.073352454 | 0.27816775 |
| hsa.miR.296.5p                | -0.4193369 | 0.23755167 | 0.077522619 | 0.29021288 |
| hsa.miR.423.3p                | -0.3438241 | 0.19701977 | 0.08096314  | 0.29597164 |
| hsa.miR.1912                  | 0.34347448 | 0.19690041 | 0.08108812  | 0.29597164 |
| hsa.miR.548g                  | 0.31725476 | 0.18394297 | 0.084573395 | 0.3019917  |
| hsa.miR.378                   | -0.3700934 | 0.21473896 | 0.084805887 | 0.3019917  |
| hsa.miR.193a.3p               | 0.32058355 | 0.18769362 | 0.08763352  | 0.3080655  |
| hsa.miR.125a.5p               | -0.4613423 | 0.27162877 | 0.089426706 | 0.3080655  |
| hsa.miR.1266                  | 0.30565063 | 0.18010107 | 0.089676602 | 0.3080655  |
| hsa.miR.224                   | 0.3116556  | 0.18625791 | 0.094278552 | 0.32010857 |
| hsa.miR.651                   | 0.34134026 | 0.20580522 | 0.097204543 | 0.32624973 |
| hsa.miR.664                   | -0.5601008 | 0.33950741 | 0.09899501  | 0.32848344 |
| hsa.miR.525.5p                | 0.32312655 | 0.19666821 | 0.100382218 | 0.32934391 |
| hsa.miR.181b_hsa.miR.181<br>d | -0.4613309 | 0.28239658 | 0.102337015 | 0.33202676 |

|                 |            |            |             |            |
|-----------------|------------|------------|-------------|------------|
| hsa.miR.421     | 0.39931736 | 0.24908081 | 0.10889847  | 0.34305444 |
| hsa.miR.328     | -0.373054  | 0.23294464 | 0.109272679 | 0.34305444 |
| hsa.miR.1180    | -0.4273023 | 0.26816288 | 0.111060799 | 0.34305444 |
| hsa.let.7d      | 0.5306327  | 0.33326361 | 0.111332769 | 0.34305444 |
| hsa.miR.499.5p  | -0.3615538 | 0.22752554 | 0.112044763 | 0.34305444 |
| hsa.miR.409.5p  | -0.3413405 | 0.2163779  | 0.114675885 | 0.34305444 |
| hsa.miR.455.3p  | 0.35857632 | 0.22764635 | 0.115222665 | 0.34305444 |
| hsa.miR.192     | -0.527609  | 0.33565961 | 0.115983684 | 0.34305444 |
| hsa.miR.376a    | -0.3370637 | 0.21462821 | 0.116309553 | 0.34305444 |
| hsa.miR.889     | -0.2819134 | 0.18117537 | 0.119702123 | 0.34844768 |
| hsa.miR.33a     | 0.2882977  | 0.1860548  | 0.121254113 | 0.34844768 |
| hsa.miR.186     | 0.30698336 | 0.1983606  | 0.121718025 | 0.34844768 |
| hsa.miR.876.3p  | -0.3666957 | 0.2404392  | 0.127232185 | 0.36069707 |
| hsa.miR.425     | 0.33544388 | 0.22066848 | 0.128479318 | 0.36073039 |
| hsa.miR.22      | -0.4172473 | 0.2773605  | 0.132491251 | 0.36845186 |
| hsa.miR.2054    | 0.25075535 | 0.17265607 | 0.146407029 | 0.40268867 |
| hsa.miR.29c     | 0.38246608 | 0.26411775 | 0.147592088 | 0.40268867 |
| hsa.miR.320c    | -0.2515403 | 0.17428296 | 0.148939644 | 0.40268867 |
| hsa.miR.27a     | -0.2415154 | 0.16878164 | 0.152449044 | 0.40839561 |
| hsa.miR.122     | 0.50397608 | 0.35466646 | 0.15532082  | 0.4118755  |
| hsa.miR.450b.5p | 0.2576432  | 0.18186083 | 0.156569112 | 0.4118755  |
| hsa.miR.346     | -0.2430956 | 0.17228397 | 0.158239677 | 0.41255344 |
| hsa.miR.2114    | 0.24101837 | 0.17188183 | 0.160845702 | 0.41563668 |
| hsa.let.7c      | -0.2971    | 0.21269294 | 0.162458853 | 0.41612268 |
| hsa.miR.25      | 0.3189414  | 0.23110152 | 0.167558263 | 0.42439258 |
| hsa.miR.145     | -0.2510241 | 0.18233295 | 0.168594313 | 0.42439258 |
| hsa.miR.194     | 0.23953406 | 0.17638572 | 0.174459629 | 0.43266737 |
| hsa.miR.370     | -0.2594902 | 0.19125174 | 0.174845035 | 0.43266737 |
| hsa.miR.2117    | -0.2201892 | 0.16284735 | 0.176336914 | 0.43269226 |
| hsa.miR.523     | 0.25795434 | 0.19264339 | 0.1805625   | 0.43884784 |
| hsa.miR.448     | -0.2826391 | 0.21170259 | 0.181851329 | 0.43884784 |
| hsa.miR.548h    | 0.27989716 | 0.21072355 | 0.184089884 | 0.44060858 |
| hsa.miR.375     | 0.25263089 | 0.19117941 | 0.186356843 | 0.44240812 |
| hsa.miR.544     | -0.2670415 | 0.20606642 | 0.195009951 | 0.45921698 |
| hsa.miR.494     | -0.2475085 | 0.19496578 | 0.204263736 | 0.47716009 |
| hsa.miR.21      | 0.22484252 | 0.18251752 | 0.217988098 | 0.50517877 |
| hsa.miR.518f    | 0.23340608 | 0.1916091  | 0.223172014 | 0.50949471 |
| hsa.miR.151.3p  | 0.21459184 | 0.176228   | 0.223340147 | 0.50949471 |
| hsa.miR.99a     | 0.33710404 | 0.2792852  | 0.227422771 | 0.51333122 |
| hsa.miR.374b    | -0.2770902 | 0.23011576 | 0.228537874 | 0.51333122 |
| hsa.miR.381     | -0.2072885 | 0.17671263 | 0.240785289 | 0.53671225 |
| hsa.miR.592     | 0.39382987 | 0.33928355 | 0.245735799 | 0.54359737 |
| hsa.miR.1979    | -0.1998258 | 0.17495261 | 0.253382928 | 0.55629936 |
| hsa.miR.363     | 0.27637372 | 0.24413672 | 0.257615578 | 0.56137126 |
| hsa.miR.491.5p  | -0.2326067 | 0.20751441 | 0.262322538 | 0.56739393 |
| hsa.miR.548a.3p | 0.20580287 | 0.18590021 | 0.26826758  | 0.57598628 |
| hsa.miR.548j    | 0.20579089 | 0.18832919 | 0.274517183 | 0.58510232 |
| hsa.miR.95      | 0.3082369  | 0.28349772 | 0.276920093 | 0.58594686 |

|                                             |            |            |             |            |
|---------------------------------------------|------------|------------|-------------|------------|
| hsa.miR.10b                                 | -0.2058838 | 0.1906573  | 0.280203134 | 0.58691171 |
| hsa.miR.490.5p                              | 0.2120838  | 0.19743474 | 0.282734418 | 0.58691171 |
| hsa.miR.93                                  | -0.256314  | 0.23894298 | 0.283405996 | 0.58691171 |
| hsa.miR.1275                                | 0.16409948 | 0.15576416 | 0.292106219 | 0.60002966 |
| hsa.miR.488                                 | -0.2417977 | 0.23131679 | 0.295879789 | 0.60002966 |
| hsa.miR.423.5p                              | 0.26880221 | 0.25716419 | 0.295905039 | 0.60002966 |
| hsa.miR.454                                 | -0.2291959 | 0.22099865 | 0.299692967 | 0.60062114 |
| hsa.miR.376b                                | 0.18722385 | 0.18075855 | 0.300310569 | 0.60062114 |
| hsa.miR.551b                                | 0.21708708 | 0.21064754 | 0.302742412 | 0.60136588 |
| hsa.miR.424                                 | -0.1979267 | 0.19344716 | 0.306233865 | 0.60419114 |
| hsa.miR.329                                 | -0.2268505 | 0.22501947 | 0.313388628 | 0.61415758 |
| hsa.miR.219.2.3p                            | 0.20116123 | 0.20060684 | 0.315974946 | 0.6150979  |
| hsa.miR.30a                                 | 0.27459256 | 0.27679839 | 0.321182447 | 0.62109453 |
| hsa.let.7e                                  | -0.3414931 | 0.34910533 | 0.327977932 | 0.62821802 |
| hsa.miR.144                                 | 0.12205365 | 0.12508201 | 0.32916903  | 0.62821802 |
| hsa.miR.190b                                | -0.1759324 | 0.18115538 | 0.331464436 | 0.62849101 |
| hsa.miR.151.5p                              | 0.19876281 | 0.20635422 | 0.335441274 | 0.63192808 |
| hsa.miR.520d.5p_hsa.miR.527_hsa.miR.518a.5p | -0.186328  | 0.19844051 | 0.347750594 | 0.65091778 |
| hsa.miR.450a                                | 0.19283431 | 0.20751851 | 0.352765197 | 0.65609833 |
| hsa.miR.361.3p                              | -0.2703621 | 0.29417837 | 0.358073966 | 0.66175695 |
| hsa.miR.9                                   | 0.2365937  | 0.25889168 | 0.360784417 | 0.66257264 |
| hsa.miR.143                                 | -0.1373046 | 0.15119163 | 0.363799117 | 0.66393339 |
| hsa.miR.580                                 | 0.16796776 | 0.19305623 | 0.384275383 | 0.69461455 |
| hsa.miR.130b                                | -0.1938794 | 0.22335114 | 0.385368344 | 0.69461455 |
| hsa.miR.132                                 | -0.1435542 | 0.16715994 | 0.390459881 | 0.69947414 |
| hsa.miR.23a                                 | 0.21241599 | 0.250367   | 0.396204945 | 0.70321813 |
| hsa.miR.149                                 | 0.14355806 | 0.1696234  | 0.397366406 | 0.70321813 |
| hsa.miR.136                                 | 0.16289265 | 0.19429333 | 0.401814407 | 0.70680607 |
| hsa.miR.504                                 | -0.2158252 | 0.25921629 | 0.405066693 | 0.70772334 |
| hsa.miR.500_hsa.miR.501.5p                  | 0.17516932 | 0.21133749 | 0.407183292 | 0.70772334 |
| hsa.miR.584                                 | 0.16026383 | 0.19461907 | 0.410238253 | 0.70881402 |
| hsa.miR.345                                 | 0.17972631 | 0.22157128 | 0.41728275  | 0.71597036 |
| hsa.miR.223                                 | 0.16687046 | 0.20762076 | 0.421554537 | 0.71597036 |
| hsa.miR.452                                 | 0.14753512 | 0.18478664 | 0.424633821 | 0.71597036 |
| hsa.miR.153                                 | -0.1385893 | 0.17362544 | 0.424749495 | 0.71597036 |
| hsa.miR.34c.5p                              | 0.17137746 | 0.21558142 | 0.42663987  | 0.71597036 |
| hsa.miR.100                                 | 0.23899882 | 0.30500409 | 0.43327945  | 0.72295771 |
| hsa.miR.98                                  | 0.14428113 | 0.18780247 | 0.442332731 | 0.72723564 |
| hsa.miR.1225.3p                             | 0.16016588 | 0.20868351 | 0.442780621 | 0.72723564 |
| hsa.miR.487a                                | 0.15961431 | 0.20820862 | 0.443314875 | 0.72723564 |
| hsa.miR.563                                 | 0.19302752 | 0.25543908 | 0.449847385 | 0.72961311 |
| hsa.miR.577                                 | 0.14241862 | 0.18852271 | 0.449981784 | 0.72961311 |
| hsa.miR.655                                 | -0.1898566 | 0.25360384 | 0.454077502 | 0.72961311 |
| hsa.miR.129.3p                              | -0.1596487 | 0.21357545 | 0.454758858 | 0.72961311 |
| hsa.miR.342.3p                              | 0.21084301 | 0.29420541 | 0.473588615 | 0.75567145 |
| hsa.miR.377                                 | 0.1682142  | 0.24260002 | 0.488070581 | 0.77454679 |



|                               |            |            |             |            |
|-------------------------------|------------|------------|-------------|------------|
| hsa.miR.1537                  | 0.13356278 | 0.19508095 | 0.493562847 | 0.77661496 |
| hsa.miR.127.3p                | -0.1056365 | 0.15469639 | 0.494693089 | 0.77661496 |
| hsa.miR.185                   | -0.1274038 | 0.18900608 | 0.500265084 | 0.77911606 |
| hsa.miR.137                   | -0.1415941 | 0.21305977 | 0.506322579 | 0.77911606 |
| hsa.miR.522                   | -0.1126848 | 0.16970721 | 0.506693376 | 0.77911606 |
| hsa.miR.379                   | -0.2118221 | 0.320663   | 0.508884634 | 0.77911606 |
| hsa.miR.99b                   | 0.14985879 | 0.22725913 | 0.509627288 | 0.77911606 |
| hsa.miR.34b                   | 0.12810071 | 0.19649039 | 0.514437368 | 0.7823735  |
| hsa.miR.431                   | -0.1263026 | 0.19537407 | 0.517978034 | 0.78367661 |
| hsa.miR.497                   | -0.1518708 | 0.23764377 | 0.522777895 | 0.78686157 |
| hsa.miR.187                   | -0.1286002 | 0.20295679 | 0.526320008 | 0.78813047 |
| hsa.miR.331.3p                | -0.1425214 | 0.22996105 | 0.535413722 | 0.79765718 |
| hsa.miR.615.5p                | -0.1042346 | 0.17359596 | 0.548210726 | 0.81208015 |
| hsa.miR.126                   | 0.13842609 | 0.23245569 | 0.551512948 | 0.81208015 |
| hsa.miR.453                   | 0.11410462 | 0.19254395 | 0.553438184 | 0.81208015 |
| hsa.miR.139.5p                | -0.1744387 | 0.29850835 | 0.558972894 | 0.81391867 |
| hsa.miR.627                   | 0.11461479 | 0.19757934 | 0.561850563 | 0.81391867 |
| hsa.miR.485.3p                | -0.144761  | 0.25084485 | 0.563876209 | 0.81391867 |
| hsa.miR.626                   | -0.1215395 | 0.21279672 | 0.567895861 | 0.81391867 |
| hsa.miR.200a                  | 0.07477245 | 0.13132932 | 0.56911811  | 0.81391867 |
| hsa.miR.539                   | 0.20081026 | 0.35480848 | 0.571415502 | 0.81391867 |
| hsa.miR.103                   | 0.13179638 | 0.23694889 | 0.578058546 | 0.81843955 |
| hsa.miR.708                   | 0.11810568 | 0.21353418 | 0.580195161 | 0.81843955 |
| hsa.miR.337.3p                | -0.1038031 | 0.19591826 | 0.596230808 | 0.83305983 |
| hsa.miR.600                   | 0.10675084 | 0.20502253 | 0.602590701 | 0.83305983 |
| hsa.miR.548f                  | 0.08458593 | 0.16297103 | 0.603743788 | 0.83305983 |
| hsa.miR.148a                  | 0.1112885  | 0.21469798 | 0.60421475  | 0.83305983 |
| hsa.miR.140.3p                | -0.1146987 | 0.22385639 | 0.608387607 | 0.83305983 |
| hsa.miR.582.5p                | -0.1277525 | 0.2522818  | 0.612584374 | 0.83305983 |
| hsa.miR.451                   | 0.06424753 | 0.12711172 | 0.613248831 | 0.83305983 |
| hsa.miR.133b                  | -0.0878572 | 0.17388854 | 0.613383097 | 0.83305983 |
| hsa.miR.193b                  | -0.1040684 | 0.20899823 | 0.618526962 | 0.83341325 |
| hsa.miR.27b                   | 0.20147419 | 0.40556879 | 0.619351627 | 0.83341325 |
| hsa.miR.106a_hsa.miR.17       | 0.11566628 | 0.23834737 | 0.627474567 | 0.84047052 |
| hsa.miR.339.3p                | 0.08996811 | 0.19359189 | 0.642124262 | 0.85616568 |
| hsa.miR.515.3p                | 0.08445484 | 0.18427719 | 0.646734591 | 0.85699749 |
| hsa.miR.496                   | -0.093977  | 0.207549   | 0.650697026 | 0.85699749 |
| hsa.miR.24                    | -0.1185449 | 0.26493544 | 0.654551486 | 0.85699749 |
| hsa.miR.204                   | -0.0838402 | 0.18962333 | 0.658387359 | 0.85699749 |
| hsa.miR.1260                  | -0.0486253 | 0.11025412 | 0.659191941 | 0.85699749 |
| hsa.miR.495                   | -0.0926296 | 0.21216203 | 0.662402744 | 0.85699749 |
| hsa.miR.517c_hsa.miR.519<br>a | 0.08797095 | 0.20205936 | 0.663292578 | 0.85699749 |
| hsa.miR.1305                  | -0.0700004 | 0.1628229  | 0.66725574  | 0.85832016 |
| hsa.miR.548a.5p               | -0.0879397 | 0.20955142 | 0.67473603  | 0.86210962 |
| hsa.miR.660                   | 0.09824672 | 0.23516265 | 0.676106513 | 0.86210962 |
| hsa.miR.766                   | 0.08241322 | 0.20194055 | 0.683195618 | 0.86553493 |
| hsa.miR.340                   | -0.0974856 | 0.24051534 | 0.685242568 | 0.86553493 |

|                                                  |            |            |             |            |
|--------------------------------------------------|------------|------------|-------------|------------|
| hsa.miR.221                                      | 0.09950861 | 0.24753491 | 0.687685283 | 0.86553493 |
| hsa.miR.106b                                     | -0.0892815 | 0.24498968 | 0.715537081 | 0.89654956 |
| hsa.miR.1977                                     | -0.0607013 | 0.1683775  | 0.718467799 | 0.89654956 |
| hsa.miR.101                                      | -0.0732697 | 0.21179938 | 0.729388356 | 0.90630383 |
| hsa.miR.326                                      | 0.06007283 | 0.18256599 | 0.742120022 | 0.9182163  |
| hsa.miR.526a_hsa.miR.518<br>d.5p_hsa.miR.520c.5p | -0.0642114 | 0.21711643 | 0.767423724 | 0.9336988  |
| hsa.miR.767.5p                                   | 0.05885276 | 0.20330671 | 0.772215841 | 0.9336988  |
| hsa.miR.146b.5p                                  | 0.06527903 | 0.22889651 | 0.775498458 | 0.9336988  |
| hsa.miR.934                                      | 0.05735821 | 0.20115914 | 0.775538067 | 0.9336988  |
| hsa.miR.10a                                      | 0.07170771 | 0.25356304 | 0.777329919 | 0.9336988  |
| hsa.miR.301a                                     | 0.07330667 | 0.2613395  | 0.77909118  | 0.9336988  |
| hsa.miR.92a                                      | 0.07661425 | 0.28101242 | 0.785132624 | 0.9336988  |
| hsa.miR.1297                                     | 0.05247665 | 0.19705862 | 0.790008424 | 0.9336988  |
| hsa.miR.208a                                     | 0.04689492 | 0.17675058 | 0.790765321 | 0.9336988  |
| hsa.miR.744                                      | -0.0439282 | 0.16799908 | 0.793723467 | 0.9336988  |
| hsa.miR.520d.3p                                  | -0.051053  | 0.20209605 | 0.800563959 | 0.9336988  |
| hsa.let.7a                                       | 0.04569716 | 0.18531193 | 0.805220988 | 0.9336988  |
| hsa.miR.1185                                     | 0.05841252 | 0.24088261 | 0.808397641 | 0.9336988  |
| hsa.miR.199b.5p                                  | -0.0439065 | 0.18166367 | 0.809019519 | 0.9336988  |
| hsa.miR.656                                      | 0.06399358 | 0.26976214 | 0.812484382 | 0.9336988  |
| hsa.miR.874                                      | -0.0405931 | 0.17499019 | 0.816558655 | 0.9336988  |
| hsa.miR.598                                      | -0.0776761 | 0.33980146 | 0.819185652 | 0.9336988  |
| hsa.miR.362.3p                                   | 0.0505075  | 0.22141063 | 0.819555397 | 0.9336988  |
| hsa.miR.382                                      | 0.0448082  | 0.19659688 | 0.819709072 | 0.9336988  |
| hsa.miR.96                                       | -0.0615672 | 0.27441999 | 0.82248203  | 0.9336988  |
| hsa.miR.31                                       | 0.05554765 | 0.2534385  | 0.826512921 | 0.9336988  |
| hsa.miR.199a.5p                                  | -0.0368799 | 0.1698366  | 0.828091916 | 0.9336988  |
| hsa.miR.365                                      | -0.0397631 | 0.18320722 | 0.828178045 | 0.9336988  |
| hsa.miR.1299                                     | -0.0295563 | 0.14233541 | 0.835500067 | 0.93833084 |
| hsa.miR.509.3p                                   | -0.0323149 | 0.15909859 | 0.839047066 | 0.938704   |
| hsa.miR.320a                                     | 0.04052342 | 0.20677456 | 0.844626805 | 0.9413398  |
| hsa.miR.181a                                     | -0.0441799 | 0.27874517 | 0.874066373 | 0.96717456 |
| hsa.miR.219.5p                                   | -0.0196961 | 0.12550904 | 0.875300251 | 0.96717456 |
| hsa.miR.1                                        | 0.0320444  | 0.20831089 | 0.877744033 | 0.96717456 |
| hsa.miR.199a.3p_hsa.miR.<br>199b.3p              | 0.029957   | 0.20629935 | 0.884544036 | 0.97100323 |
| hsa.miR.603                                      | 0.02400209 | 0.17388467 | 0.890213121 | 0.97155798 |
| hsa.miR.181c                                     | 0.04156224 | 0.30527143 | 0.891703898 | 0.97155798 |
| hsa.miR.152                                      | -0.0221594 | 0.1737382  | 0.898509044 | 0.97532564 |
| hsa.let.7i                                       | 0.04060835 | 0.32925369 | 0.9018422   | 0.97532564 |
| hsa.miR.188.5p                                   | 0.01813239 | 0.18863191 | 0.923420663 | 0.99376104 |
| hsa.miR.590.5p                                   | -0.0234771 | 0.29716793 | 0.937030361 | 0.99376104 |
| hsa.miR.195                                      | -0.0162449 | 0.23014336 | 0.943727422 | 0.99376104 |
| hsa.miR.516a.3p                                  | -0.0126787 | 0.18233064 | 0.944562096 | 0.99376104 |
| hsa.miR.514                                      | -0.0114851 | 0.16962838 | 0.946018612 | 0.99376104 |
| hsa.miR.432                                      | 0.01861321 | 0.28656682 | 0.948211876 | 0.99376104 |
| hsa.miR.595                                      | -0.01221   | 0.21988635 | 0.955717242 | 0.99376104 |

|                |            |            |             |            |
|----------------|------------|------------|-------------|------------|
| hsa.miR.29a    | -0.0150584 | 0.2768515  | 0.956623048 | 0.99376104 |
| hsa.miR.324.5p | 0.01216005 | 0.23782781 | 0.959222233 | 0.99376104 |
| hsa.miR.520e   | -0.0067663 | 0.13443826 | 0.959859425 | 0.99376104 |
| hsa.miR.107    | 0.01024586 | 0.25809789 | 0.968334247 | 0.99376104 |
| hsa.miR.16     | -0.0088474 | 0.25056923 | 0.971833157 | 0.99376104 |
| hsa.miR.206    | 0.00759115 | 0.21981103 | 0.972450604 | 0.99376104 |
| hsa.miR.1286   | 0.00592031 | 0.17883861 | 0.973591491 | 0.99376104 |
| hsa.miR.542.3p | -0.0051861 | 0.18852594 | 0.978054084 | 0.99376104 |
| hsa.miR.579    | 0.0044635  | 0.17848191 | 0.980048457 | 0.99376104 |
| hsa.miR.135a   | 0.00479346 | 0.20259621 | 0.981123701 | 0.99376104 |
| hsa.miR.146a   | -0.0080087 | 0.34695576 | 0.981584254 | 0.99376104 |
| hsa.miR.34a    | 0.00399646 | 0.19384273 | 0.983551166 | 0.99376104 |
| hsa.miR.140.5p | -0.0010755 | 0.28031116 | 0.996938754 | 0.99894955 |
| hsa.miR.330.3p | 0.00056747 | 0.16512765 | 0.997258037 | 0.99894955 |
| hsa.miR.873    | 0.00031513 | 0.23935908 | 0.998949548 | 0.99894955 |

**Supplementary Table 2:** Genes that are common between predicted targets of miR-484 and BLSA protein co-expression module M1 blue

ARL15  
ATP6V1D  
SEMA4D  
CACNA1E  
SEPT3  
ABR  
CPLX2  
WDFY1  
SLC25A27  
CNRIP1  
C2CD2L  
GPD2  
PHYHIP  
BAIAP2  
RTN3  
SH3GLB2  
DBNL  
ATP6V1F  
SH3GL1  
SV2B  
HPCAL1  
LASP1  
GABBR2  
VAMP2  
RAB3D  
CRMP1  
GNB1  
AP1G1  
RAPGEF4  
PIP5K1C  
ADD2  
LINGO1  
CAPN5  
PCDH1  
STMN3  
AP1S1  
GIT1  
ARMC10  
NCAM1  
TLN2  
GNG4  
CAPZA2

PAM  
PGM2L1  
NCKAP1  
MCTS1
